# Supplementary material
Source: Research Square preprint supplement (doi:10.21203/rs.3.rs-9246424/v1)
Supplement: Supplementary file 1 [file 62f04800e1e039a9063508b1.docx]

**Supplementary materials**

**S1-** Morphological characteristics of bacterial isolates

| S. No. | Isolates | Morphology | | | |
| --- | --- | --- | --- | --- | --- |
| Colony Form | Colour | Elevation | Margine |
| 1 | SW 1 | circular | Dark Yellow opaque | Convex | Entire |
| 2 | SW 2 | Circular | Creamy | Convex | Smooth |
| 3 | SW 3 | Circular | Yellow opaque | Convex | Entire |
| 4 | SW 4 | Circular | Creamy | Convex | Entire |
| 5 | SW 5 | Circular | Yellow opaque | Convex | Irregular |
| 6 | SW 6 | Round | Creamy white | Raised | Wavy |
| 7 | SW 7 | Circular | Creamy fluorescent | Convex | Entire |
| 8 | SW 8 | Punctiform | Shiny | Convex | Irregular |
| 9 | SW 9 | Circular | White | Convex | Irregular |
| 10 | SW 10 | Round | Deep golden yellow | Convex | Smooth |
| 11 | SW 11 | Circular | Creamy | Flat | Wavy |
| 12 | SW 12 | Round | White | Raised | Lobate |
| 13 | SW 13 | Filamentous | White | Flat | Irregular |

*****SW denotes the bacteria isolated from the wastewater sample.

**S2 –** Microscopic and Biochemical characteristics of bacterial isolates

| **Isolates** | **Microscopic Examination** | | | **Biochemical Test** | | | | | | **Bacteria**  **Species** |
| --- | --- | --- | --- | --- | --- | --- | --- | --- | --- | --- |
| M1 | M2 | M3 | B1 | B2 | B3 | B4 | B5 | B6 |
| SW 1 | + | Rod | Motile | + | - | + | - | - | - | *Bacillus* sp. |
| SW 2 | - | Rod | Motile | + | + | - | - | - | - | *Pseudomonas* sp. |
| SW 3 | + | Rod | Motile | - | + | + | - | - | - | *Bacillus* sp. |
| SW 4 | + | Rod | Motile | - | + | + | - | - | - | *Bacillus* sp. |
| SW 5 | + | Rod | Motile | - | + | + | - | - | - | *Bacillus* sp. |
| SW 6 | + | Rod | Motile | - | + | - | + | - | - | *Bacillus* sp. |
| SW 7 | - | Rod | Motile | + | + | + | + | - | - | *Pseudomonas* sp. |
| SW 8 | - | Rod | Motile | + | + | + | + | - | - | *Pseudomonas* sp. |
| SW 9 | - | Rod | Motile | + | + | + | + | - | - | *Pseudomonas* sp. |
| SW 10 | + | Cocci | Non-motile | + | + | + | - | + | + | *Staphylococcus* sp. |
| SW 11 | + | Cocci | Non-motile | + | + | + | - | - | + | *Staphylococcus* sp. |
| SW 12 | + | Rod | Motile | + | + | + | - | - | - | *Bacillus* sp. |
| SW 13 | + | Rod | Motile | + | + | + | - | + | - | *Bacillus* sp. |

M1=Gram staining; M2=Shape; M3=Motility

B1= Starch hydrolysis test; B2=Catalyse test; B3=Gelatine liquefaction; B4=H2S, B5=MR test; B6=VP test

**S3- 16S rRNA sequencing of isolates in FASTA format.**

**> *Lysinibacillus xylanilyticus* DSM 23493 (T)/ *Lysinibacillus capsici* PB300(T)**

CTATAGGATGGGCCCGCGGCGCATTAGCTAGTTGGTGAGGTAACGGCTCACCAAGGCGACGATGCGTAGCCGACCTGAGAGGGTGATCGGCCACACTGGGACTGAGACACGGCCCAGACTCCTACGGGAGGCAGCAGTAGGGAATATTCCACAATGGGCGAAAGCCTGATGGAGCACGCCGCGTGAGTGAAGAAGGCTTTCGGATGTAAAACTCTGTTGTAAGGGAAGAACAAGTACAGTAGTAACTGGCTGTACCTTGACGGTACCTTATTAAAAAGCCCGGCTAACTCGTGCCAGCAGCCGCGGTAATACGTAGGGGCAAGCGTTGTTCGGAATTATTGGGCGTAAAGCGCGCGCAGGCGGTCCTTTAAGTCTGATGTGAAAGCCCCGGCTCAACCGGGAGGCATTGGAAACTGGGGGACTTGAGTGCAGAAGAGGAAAGTGGAATTCCAAGTGTAGCGGTGAAATGCGTAGAGATTGGAGGAACACCAGTGGCGAAGGCGCTTTCTGGTCTGTAACTGACGCTGAGGCGCGAAAGCGTGGGGAGCAAACAGGATTAGATACCCTGGTAGTCCACGCCGTAAACGATGAGTGCTAAGTGTTAGGGGGTTTCCGCCCCTCAGTGCTGCAGCTAACGCATAAGCACTCCGCTGAGAGTTCC

**> *Pseudomonas atacamensis* M7D1(T)**

GCGTTAGCTGCGCCACTAAGAGCTCTTGGATCCCAACGGCTATCATCTTTAGGGTGGATACAGGTATCTAATCCTGTTGTCCCACGCTTTCCACCTCATGTCAGTATTACCCAGGGTCGCCTTCCCACTGGGTTCCTTCCTATATCTACCATTTCACCGCTACACAGGAAATTCCACCCCTCCCAACTCAGCTTGCCAGTTTTGGATGCAGTTCCCAGGTTGAGCCCGGGGCTTTCACATCCAATTAACAAACCACCTACGCGCGCTTTACGCCCAGTAATTCCGATTAACGCTTGACCCTTCGTATTACCGCGGCTGCTGGCACGAATTAGCCGTGCTTATTCTGTCGGTAACGTCAAAATTCAGGGTATTAACCTACAACCCTTCCTCCCAACTAAAGTGCTTTACAATCCGAAACCTTCTCACACACGCGCATGCTGGATCAGGTTTCGCCCATTGTCCAAATCCCCACTGCTGCCTCCCGTAGATCTGGACGTGTCTCATTCCGTGTGACTGATCATCCTCTCAGACCAGTTACGGATCGTCGCCCTTGGTGAGCCATTACCTCACCAACTAGCTAATCCGACCTAGGCTCATCTGATAGCGCAAGGCCCGAAGGTCCCCTGCTTTCTCCCGTAGGACGTATGCAGTATTACCGTTCCTTTCCAAACGTTGCCCCCCACTACCAGGCATATTCCTAGGGATTACTCACCCGTCCGCCGCTGAATCGCGGAGCAAGCTCCACTCATCCGCTCGACTTGCATGTGTTAGGCCTGCCGCCAGCGTTCAATCT

**> *Brevibacillus borstelensis* NRRL NRS818(T)**

CTGGCTCAGGACGAACGCTGGCGGCGTGCCTAATACATGCAAGTCGAGCGAGTCCCTTCGGGGGCTAGCGGCGGACGGGTGAGTAACACGTAGGCAACCTGCCCGTAAGCTCGGGATAACATGGGGAAACTCATGCTAATACCGGATAGGGTCTTCTCTCGCATGAGAGGAGACGGAAAGGTGGCGCAAGCTACCACTTACGGATGGGCCTGCGGCGCATTAGCTAGTTGGTGGGGTAACGGCCTACCAAGGCGACGATGCGTAGCCGACCTGAGAGGGTGACCGGCCACACTGGGACTGAGACACGGCCCAGACTCCTACGGGAGGCAGCAGTAGGGAATTTTCCACAATGGACGAAAGTCTGATGGAGCAACGCCGCGTGAACGATGAAGGTCTTCGGATTGTAAAGTTCTGTTGTCAGAGACGAACAAGTACCGTTCGAACAGGGCGGTACCTTGACGGTACCTGACGAGAAAGCCACGGCTAACTACGTGCCAGCAGCCGCGGTAATACGTAGGTGGCAAGCGTTGTCCGGAATTATTGGGCGTAAAGCGCGCGCAGGCGGCTATGTAAGTCTGGTGTTAAAGCCCGGGGCTCAACCCCGGTTCGCATCGGAAACTGTGTAGCTTGAGTGCAGAAGAGGAAAGCGGTATTCCACGTGTAGCGGTGAATGCGTAGAGATGTGGAGGAACACCAGTGGCGAAGGCGGCTTTCTGGTCTGTAACTGACGCTGAGGCGCGAAAGCGTGGGGAGCAAACAGGATTAGATACCCTGGTAGTCCACGCCGTAAACGATGAGTGCTAGGTGTTGGGGGTTTCAATACCCTCAGTGCCGCAGCTAACGCAATAAGCACTCCGCCTGGGGAGTACGCTCGCAAGAGTGAAACTCAATG

**> *Brevibacillus borstelensis* NRRL NRS818(T)**

ACACGTAGGCAACCTGCCCGTAAGCTCGGGATAACATGGGGAAACTCATGCTAATACCGGATAGGGTCTTCTCTCGCATGAGAGGAGACGGAAAGGTGGCGCAAGCTACCACTTACGGATGGGCCTGCGGCGCATTAGCTAGTTGGTGGGGTAACGGCCTACCAAGGCGACGATGCGTAGCCGACCTGAGAGGGTGACCGGCCACACTGGGACTGAGACACGGCCCAGACTCCTACGGGAGGCAGCAGTAGGGAATTTTCCACAATGGACGAAAGTCTGATGGAGCAACGCCGCGTGAAC

GATGAAGGTCTTCGGATTGTAAAGTTCTGTTGTCAGAGACGAACAAGTACCGTTCGAACAGGGCGGTACCTTGACGGTACCTGACGAGAAAGCCACGGCTAACTACGTGCCAGCAGCCGCGGTAATACGTAGGTGGCAAGCGTTGTCCGGAATTATTGGGCGTAAAGCGCGCGCAGGCGGCTATGTAAGTCTGGTGTTAAAGCCCGGGGCTCAACCCCGGTTCGCATCGGAAACTGTGTAGCTTGAGTGCAGAAGAGGAAAGCGGTATTCCACGTGTAGCGGTGAAATGCGTAGAGATGTGGAGGAACACCAGTGGCGAAGGCGGCTTTCTGGTCTGTAACTGACGCTGAGGCGCGAAAGCGTGGGGAGCAAACAGGATTAGATACCCTGGTAGTCCCGCCGTAAACGATGAGTTAGGTGTGGGGGTTTCAATACCCTCAGTGCCGCAGCTAACGCAATAAGCACTCCGCCTGGGGAGTACGCTCGCAAGAGTGAAACTCAAATGAA

**> *Brevibacillus borstelensis* NRRL NRS818(T)**

CCGTCAATTCCTTTGAGTTTTCACTCTTGCGAGCGTACTCCCCTAGGCGGAGTGCTTATTGCGTTAGCTGCGGCACTGAGGGTATTGAAACCCCCAACACCTAGCACTCATCGTTTACGGCGTGGACTACCAGGGTATCTAATCCTGTTTGCTCCCCACGCTTTCGCGCCTCAGCGTCAGTTACAGACCAGAAAGCCGCCTTCGCCACTGGTGTTCCTCCACATCTCTACGCATTTCACCGCTACACGTGGAATACCGCTTTCCTCTTCTGCACTCAAGCTACACAGTTTCCGATGCGAACCGGGGTTGAGCCCCGGGCTTTAACACCAGACTTACATAGCCGCCTGCGCGCGCTTTACGCCCAATAATTCCGGACAACGCTTGCCACCTACGTATTACCGCGGCTGCTGGCACGTAGTTAGCCGTGGCTTTCTCGTCAGGTACCGTCAGGTACCGCCCTGTTCGAACGGTACTTGTTCGTCTCTGACAACAGAACTTACAATCCGAAGACCTTCATCGTTCACGCGGCGTTGCTCCATCAGACTTTCGTCCATTGTGGAAAATTCCCTACTGCTGCCTCCCGTAGGAGTCTGGGCCGTGTCTCAGTCCCAGTGTGGCCGGTCACCCTCTCAGGTCGGCTACGCATCGTCGCCTTGGTAGGCCGTTACCCCACCAACTAGCTAATGCGCCGCAGGCCCATCCGTAAGTGGTAGCTTGCGCCACCTTTCCGTCTCCTCTCATGCGAGAGAAGACTCTATCCGGTATTAGCATGAGTTTCCCCATGTTATCCCGAGCTTACGGGCAGGTTGCCTACGTGTTACTCACCCGTCCGCCGCTAGCCCCCGAAGGGACTCGCTCGACTTGCATGTATTAAGGC

**>*Bacillus badius* MTCC 1458(T)**

TTTGAGTTTCAGCCTTGCGGCCGTACTCCCCAGGCGGAGTGCTTAATGCGTTAGCTGCAGCACTGAAGGGCGGAAACCCTCCAACACTTAGCACTCATCGTTTACGGCGTGGACTACCAGGGTATCTAATCCTGTTCGCTCCCCACGCTTTCGCGCCTCAGCGTCAGTTACAGACCAGAGAGCCGCCTTCGCCACTGGTGTTCCTCCACATCTCTACGCATTTCACCGCTACACGTGGAATTCCGCTCTCCTCTTCTGCACTCAAGCCTCCCAGTTTCCAATGACCCTCCACGGTTGAGCCGTGGGCTTTCACATCAGACTTAAGAAGCCGCCTGCGCGCGCTTTACGCCCAATAATTCCGGACAACGCTTGCCACCTACGTATTACCGCGGCTGCTGGCACGTAGTTAGCCGTGGCTTTCTGGTCAGGTACCGTCAAGGTACGGACAGTTACTTCCGTACTTGTTCTTCCCTGACAACAGAGCTTTACGATCCGAAAACCTTCTTCACTCACGCGGCGTTGCTCCGTCAGACTTCGTCCATTGCGGAAGATTCCCTACTGCTGCCTCCCGTAGGAGTCTGGGCCGTGTCTCAGTCCCAGTGTGGCCGATCACCCTCTCAGGTCGGCTACGCATCGTTGCCTTGGTGAGCCGTTACCTCACCAACTAGCTAATGCGCCGCGGGTCCATCTGTAAGCGACAGCTAAAAGCCGCCTTTCCATTCTTCTTCATGCGAAGAAAAAGAATATCCGGTATTAGCCCCG

**S4 –** Summary of the closest neighbour of bacterial isolates

| S. No. | PRN | Strain No. | Closest Neighbour | | % Similarity |
| --- | --- | --- | --- | --- | --- |
| Taxonomic Designation | Accession No. |
| 1 | A_JUN_22_104 B | B. Isolate 1 | *Lysinibacillus xylanilyticus* DSM 23493(T) | LFXJ01000007 | 98.18 |
| *Lysinibacillus capsici* PB300(T) | PXXX01000046 | 98.18 |
| 2 | A_JUN_22_105 B | B. Isolate 2 | *Pseudomonas atacamensis* M7D1(T) | SSBS01000008 | 93.55 |
| 3 | A_JUN_22_106 B | B. Isolate 3 | *Brevibacillus borstelensis* NRRL NRS818(T) | D7845 | 99.89 |
| 4 | A_JUN_22_107 B | B. Isolate 4 | *Brevibacillus borstelensis* NRRL NRS 818(T) | D78456 | 99.88 |
| 5 | A_JUN_22_108 B | B. Isolate 5 | *Brevibacillus borstelensis* NRRL NRS 818(T) | D78456 | 99.54 |
| 6 | A_JUN_22_109 B | B. Isolate 6 | *Bacillus badius* MTCC 1458(T) | JXLP01000009 | 100.00 |
